# Supplementary material for: Early biliary decompression versus conservative treatment in acute biliary pancreatitis (APEC trial): study protocol for a randomized controlled trial
Source: PubMed Central journal article supplement (PMC4700728; doi:10.1186/s13063-015-1132-0), 2016-01-05

**Figure S1.** Flowchart APEC trial according to CONSORT [43]

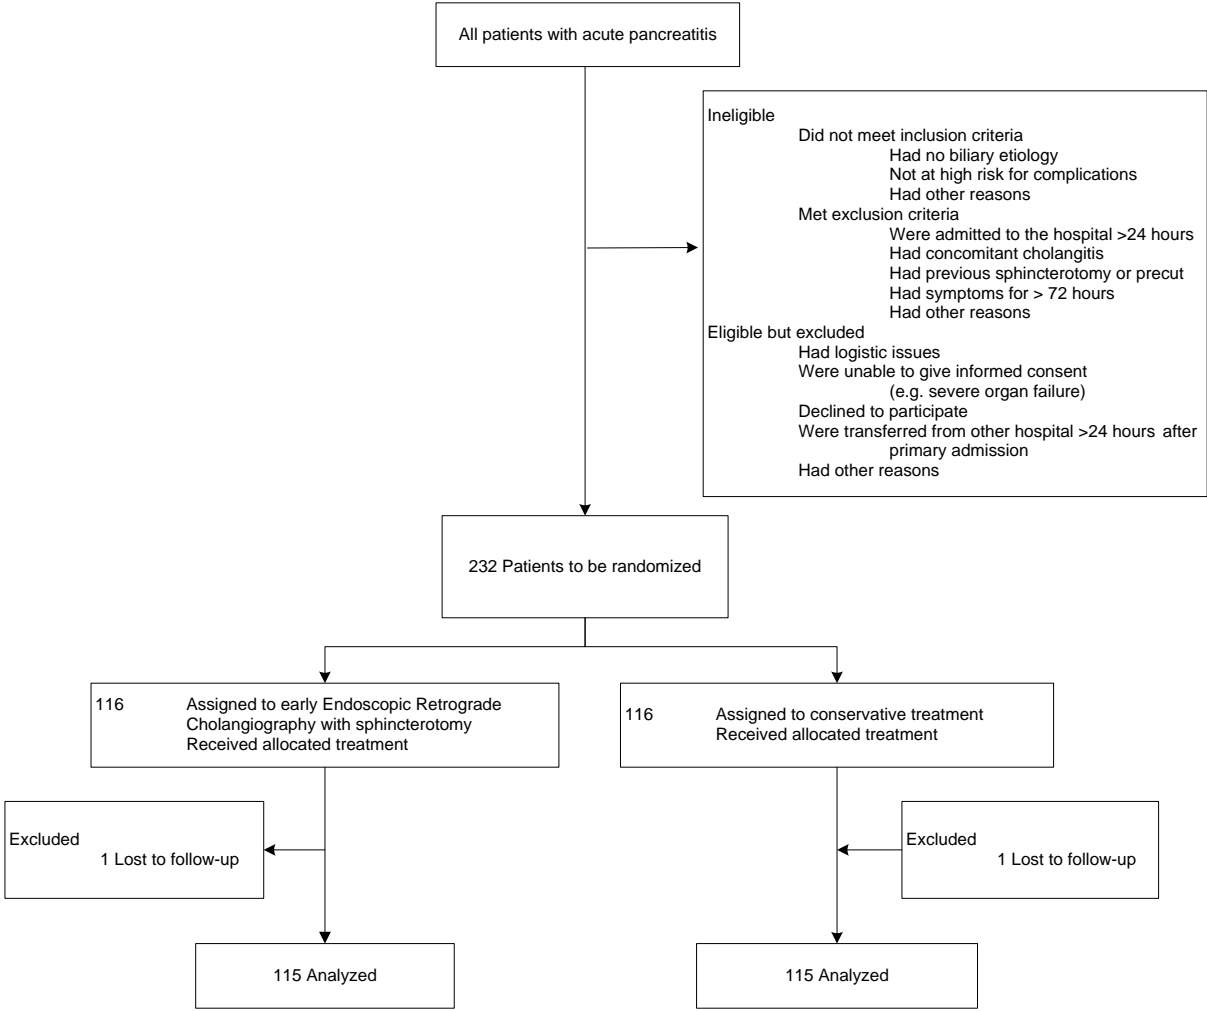

Supplement: 13063_2015_1132_MOESM1_ESM.pdf [file 13063_2015_1132_MOESM1_ESM.pdf]
