# Supplementary material for: Early biliary decompression versus conservative treatment in acute biliary pancreatitis (APEC trial): study protocol for a randomized controlled trial
Source: PubMed Central journal article supplement (PMC4700728; doi:10.1186/s13063-015-1132-0), 2016-01-05
Supplement: 13063_2015_1132_MOESM5_ESM.pdf [file 13063_2015_1132_MOESM5_ESM.pdf]

**Additional file 5: Table S4.** Modified Glasgow score [20]

|                                |                          |
|--------------------------------|--------------------------|
| Each parameter scores 1 point. |                          |
| Age                            | >55 years                |
| PO2 arterial                   | <60 mmHg                 |
| Albumine                       | <32 g/L                  |
| Total calcium                  | <2 mmol/L                |
| Leukocytes                     | >15 x 10 <sup>9</sup> /L |
| LDH                            | >600 U/L                 |
| Glucose (non diabetics)        | >10 mmol/L               |
| Ureum after rehydration        | >16 mmol/L               |
