# Supplementary material for: Early biliary decompression versus conservative treatment in acute biliary pancreatitis (APEC trial): study protocol for a randomized controlled trial
Source: PubMed Central journal article supplement (PMC4700728; doi:10.1186/s13063-015-1132-0), 2016-01-05
Supplement: 13063_2015_1132_MOESM6_ESM.pdf [file 13063_2015_1132_MOESM6_ESM.pdf]

**Additional file 6: Table S3.** Acute Physiology and Chronic Health Evaluation (APACHE II score) [19]

| Physiological variable                                                                      | High abnormal                           |                       |                                                                                                                                                                                                                                                                |           |               | Low abnormal |           |            |           |
|---------------------------------------------------------------------------------------------|-----------------------------------------|-----------------------|----------------------------------------------------------------------------------------------------------------------------------------------------------------------------------------------------------------------------------------------------------------|-----------|---------------|--------------|-----------|------------|-----------|
|                                                                                             | +4                                      | +3                    | +2                                                                                                                                                                                                                                                             | +1        | 0             | +1           | +2        | +3         | +4        |
| Temperature (°C)                                                                            | ≥ 41                                    | 39.0-40.9             |                                                                                                                                                                                                                                                                | 38.5-38.9 | 36-38.4       | 24-35.9      | 32-33.9   | 30-31.9    | ≤ 29.9    |
| Mean Arterial Pressure (mmHg)                                                               | ≥ 160                                   | 130-159               | 110-129                                                                                                                                                                                                                                                        |           | 70-109        |              | 50-69     |            | ≤ 49      |
| Heart rate                                                                                  | ≥ 180                                   | 140-179               | 110-139                                                                                                                                                                                                                                                        |           | 70-109        |              | 55-69     | 40-54      | ≤ 39      |
| Respiratory rate                                                                            | ≥ 50                                    | 35-49                 |                                                                                                                                                                                                                                                                | 25-34     | 12-24         | 10-11        | 6-9       |            | ≤ 5       |
| Oxygenation<br>FiO2 ≥ 0.5, record A-aDO <sub>2</sub><br>FiO2 < 0.5, record PaO <sub>2</sub> | ≥ 500<br>-                              | 350-49<br>-           | 200-349<br>-                                                                                                                                                                                                                                                   | -<br>-    | < 200<br>> 70 | -<br>61-70   | -<br>-    | -<br>55-60 | -<br>≤ 55 |
| Arterial pH                                                                                 | ≥ 7.7                                   | 7.6-7.69              |                                                                                                                                                                                                                                                                | 7.5-7.59  | 7.33-7.49     |              | 7.25-7.32 | 7.15-7.24  | ≤ 7.14    |
| Serum sodium (mmol/l)                                                                       | ≥ 180                                   | 160-179               | 155-159                                                                                                                                                                                                                                                        | 150-154   | 130-149       |              | 120-129   | 111-119    | ≤ 110     |
| Serum potassium (mmol/l)                                                                    | ≥ 7                                     | 6.0-6.9               |                                                                                                                                                                                                                                                                | 5.5-5.9   | 3.5-5.4       | 3-3.4        | 2.5-2.9   |            | ≤ 2.4     |
| Serum creatinine (µmol/l)<br>Double score for AKI                                           | ≥ 302                                   | 169-301               | 125-168                                                                                                                                                                                                                                                        |           | 53-124        |              | ≤ 52      |            |           |
| Haematocrit (%)                                                                             | ≥ 60                                    |                       | 50-59.9                                                                                                                                                                                                                                                        | 46-49.9   | 30-45.9       |              | 20-29.9   |            | ≤ 19      |
| White blood cell count (total/mm <sup>3</sup> )                                             | ≥ 40                                    |                       | 20-39.9                                                                                                                                                                                                                                                        | 15-19.9   | 3-14.9        |              | 1-2.9     |            | ≤ 0.9     |
| 15 - Glasgow coma scale                                                                     |                                         |                       |                                                                                                                                                                                                                                                                |           |               |              |           |            |           |
| Total Acute Physiology score (APS)                                                          |                                         |                       |                                                                                                                                                                                                                                                                |           |               |              |           |            |           |
| Age points                                                                                  | < 44<br>45-54<br>55-64<br>65-74<br>≥ 75 | 0<br>2<br>3<br>5<br>6 | Chronic Health points: If the patient has a history of severe organ system insufficiency or is immunocompromised, assign points as follows:<br>For non-operative or emergency postoperative patients, 5 points<br>For elective postoperative patients, 2 point |           |               |              |           |            |           |
| APACHE-II score<br>(sum of APS + age points + chronic health points)                        |                                         |                       | A-aDO <sub>2</sub> , alveolar-arterial oxygen tension difference; AKI, acute kidney injury; FiO <sub>2</sub> , fractional inspired oxygen; PaO <sub>2</sub> , arterial oxygen tension                                                                          |           |               |              |           |            |           |
