# Supplementary material for: Early biliary decompression versus conservative treatment in acute biliary pancreatitis (APEC trial): study protocol for a randomized controlled trial
Source: Springer Nature journal article supplement (doi:10.1186/s13063-015-1132-0), 2016-01-05

**Figure S2.** Flowchart study protocol APEC trial

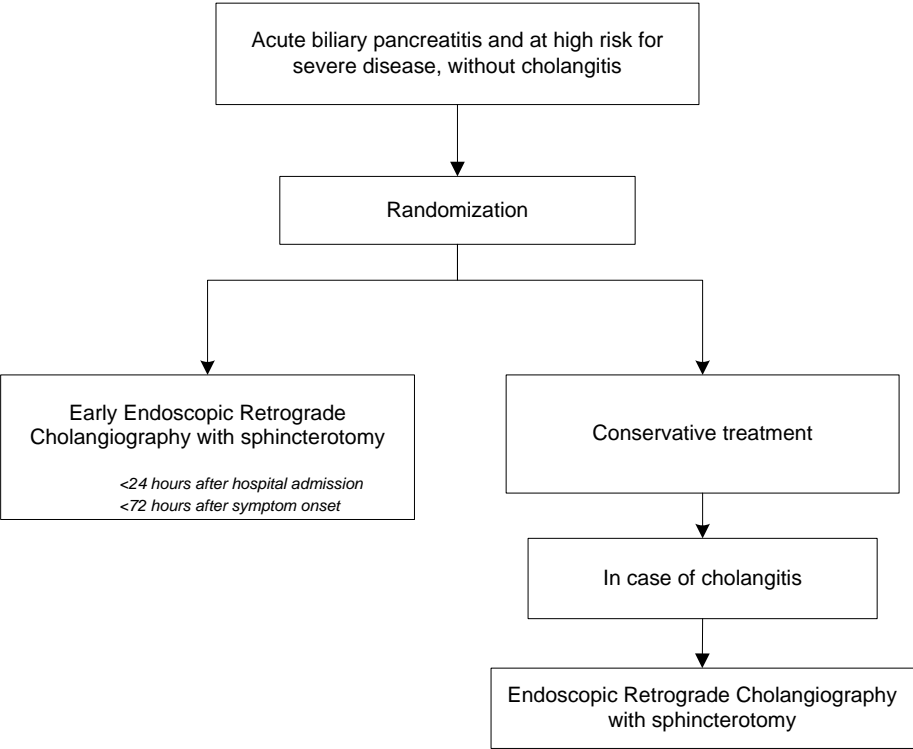

Supplement: MOESM2 [file 9782892]
