# Supplementary material for: Early biliary decompression versus conservative treatment in acute biliary pancreatitis (APEC trial): study protocol for a randomized controlled trial
Source: Springer Nature journal article supplement (doi:10.1186/s13063-015-1132-0), 2016-01-05
Supplement: MOESM4 [file 9782892]

**Additional file 4: Table S2.** ERC related complications

| <b>Event</b>                  | <b>Definition</b>                                                                                                                                                                                                                                                                                                                                                                                   |
|-------------------------------|-----------------------------------------------------------------------------------------------------------------------------------------------------------------------------------------------------------------------------------------------------------------------------------------------------------------------------------------------------------------------------------------------------|
| Clinically relevant bleed     | The presence of melena, hematochezia or hematemesis, in combination with a hemoglobin drop of 1.3 mmol/L or the need for blood transfusion (defined according to the American Society for Gastrointestinal Endoscopy ASGE [39])                                                                                                                                                                     |
| Perforation                   | New development of free gas on imaging with progressive complaints of abdominal discomfort and pain after ERC, or perforation detected at surgery                                                                                                                                                                                                                                                   |
| Respiratory insufficiency     | $pO_2 < 60$ mmHg despite $FiO_2$ of 30% or requiring mechanical ventilation                                                                                                                                                                                                                                                                                                                         |
| Cardiovascular complications  |                                                                                                                                                                                                                                                                                                                                                                                                     |
| ○ Acute myocardial infarction | (1) Typical rise and gradual fall (troponin) or more rapid rise and fall (CK-MB) of biochemical markers of myocardial necrosis with at least one of the following: (a) ischemic symptoms; (b) development of pathologic Q-waves on the ECG; (c) ECG changes indicative of ischemia (ST segment elevation or depression); or (d) coronary artery intervention (e.g., coronary angioplasty) [40, 41]. |
| ○ Cerebrovascular accident    | Defined by the clinical event and subsequent findings on cross-sectional imaging investigations                                                                                                                                                                                                                                                                                                     |
| ○ Shock                       | Systolic blood pressure below 90 mmHg despite adequate fluid resuscitation or need for inotropic catecholamine support                                                                                                                                                                                                                                                                              |
