# Supplementary material for: Early biliary decompression versus conservative treatment in acute biliary pancreatitis (APEC trial): study protocol for a randomized controlled trial
Source: Springer Nature journal article supplement (doi:10.1186/s13063-015-1132-0), 2016-01-05
Supplement: MOESM7 [file 9782892]

**Additional file 7: Table S5.** Definition of Chronic Pancreatitis

|                                                                                                                                                                                                                                                                                                             |
|-------------------------------------------------------------------------------------------------------------------------------------------------------------------------------------------------------------------------------------------------------------------------------------------------------------|
| Chronic pancreatitis is confirmed according to the following criteria (adapted from the M-ANNHEIM diagnostic criteria) [42]:                                                                                                                                                                                |
| <ul style="list-style-type: none"><li>• Typical clinical history of chronic pancreatitis (i.e. recurrent pancreatitis or abdominal pain), <b>and:</b></li></ul>                                                                                                                                             |
| One or more of the following additional criteria for the diagnosis of chronic pancreatitis:                                                                                                                                                                                                                 |
| <ul style="list-style-type: none"><li>• Pancreatic calcifications</li></ul>                                                                                                                                                                                                                                 |
| <ul style="list-style-type: none"><li>• Moderate or marked ductal lesions (according to the Cambridge classification) on MRCP, CT, or EUS</li></ul>                                                                                                                                                         |
| <ul style="list-style-type: none"><li>• Marked and persistent exocrine insufficiency defined as:<ul style="list-style-type: none"><li>○ Pancreatic steatorrhea clearly relieved by enzyme supplementation, and/or</li><li>○ Fecal elastase levels of <math>\leq 200\mu\text{g/g}</math></li></ul></li></ul> |
