# Supplementary material for: Early biliary decompression versus conservative treatment in acute biliary pancreatitis (APEC trial): study protocol for a randomized controlled trial
Source: Springer Nature journal article supplement (doi:10.1186/s13063-015-1132-0), 2016-01-05
Supplement: MOESM8 [file 9782892]

## **Additional file 8**

Ethical bodies that approved the study in the various centers, all in the Netherlands.

### **Albert Schweitzer Hospital, Dordrecht:**

- Wetenschappelijk Onderzoek Advies Commissie (WOAC)

### **AMC Amsterdam:**

- Medisch Ethische Toetsingscommissie (MEC AMC)

### **Amphia Hospital, Breda:**

- Adviescommissie Mensgebonden Onderzoek Amphia (AMOA)

### **Canisius Wilhelmina Hospital, Nijmegen:**

- Lokale Toetsingscommissie (LTC)

### **Catharina Hospital, Eindhoven:**

- Lokale beoordelingscommissie / Medisch Ethische Toetsingscommissie (METC), Catharina Ziekenhuis Eindhoven

### **Erasmus Medical Center, Rotterdam:**

- Medisch Ethische Toetsingscommissie, Erasmus Medisch Centrum (METC-EMC)

### **Gelre Hospital, Apeldoorn:**

- Medisch Ethische Toetsingscommissie (METC) Gelre Ziekenhuizen

### **Jeroen Bosch Ziekenhuis, Den Bosch:**

- Wetenschapsbureau Jeroen Bosch Ziekenhuis

### **Kennemer / Spaarne Gasthuis, Haarlem:**

- Adviescommissie lokale uitvoerbaarheid (ACLU)

### **Maasstad Hospital, Rotterdam:**

- Toetsingscommissie Wetenschappelijk Onderzoek Rotterdam e.o. (TWOR)

### **Maastricht UMC, Maastricht:**

- Medisch Ethische toetsingscommissie academisch ziekenhuis Maastricht en Maastricht University (METC azM/UM) / Clinical Trial Center Maastricht (CTCM)

### **Martini Hospital, Groningen:**

- Medisch Ethische Commissie / Wetenschappelijk Instituut

### **Meander Medical Center, Amersfoort:**

- commissie Toetsing Wetenschappelijk Onderzoek (TWO)

### **Medisch Spectrum Twente, Enschede:**

- Medisch Ethische Toetsingscommissie Twente (METC Twente)

### **Onze Lieve Vrouwe Gasthuis, Amsterdam:**

- Medisch-ethische commissie - Onze Lieve Vrouwe Gasthuis (MEC-OLVG)

### **Reinier de Graaf Hospital, Delft:**

- Board of Directors Reinier de Graaf Hospital, Delft

**Rijnstate Hospital, Arnhem:**

- Lokale Haalbaarheidscommissie – Rijnstate Arnhem

**Sint Franciscus Gasthuis, Rotterdam:**

- Medisch Ethische Toetsingscommissie / adviserende commissie wetenschap

**St. Antonius Hospital, Nieuwegein:**

- Research & Development (R&D) Lokale Toetsing

**St. Elisabeth Hospital, Tilburg:**

- Medisch Ethische Toetsingscommissie (METC Brabant) / Wetenschapsbureau Elisabeth-TweeSteden Ziekenhuis

**St. Lucas Andreas Hospital, Amsterdam:**

- Adviescommissie uitvoering Wetenschappelijk Onderzoek (ACWO)

**UMC St Radboud, Nijmegen:**

- Commissie Mensgebonden Onderzoek (CMO) Radboudumc

**UMC Utrecht:**

- Medisch Ethische Toetsingscommissie, Universitair Medisch Centrum Utrecht (METC-UMCU)

**UMCG, Groningen:**

- Medisch Ethische Toetsingscommissie, Universitair Medisch Centrum Groningen (METC-UMCG)

**VU University Medical Center, Amsterdam:**

- Medisch Ethische Toetsingscommissie – Vrije Universiteit Medisch Centrum (METc-VUmc)

**Ziekenhuis Gelderse vallei, Ede:**

- BeoordelingsCommissie Wetenschappelijk Onderzoek (BCWO)
